# Supplementary figures and images for: Amination of benzylic C–H bonds by aryl azides catalysed by CoII(porphyrin) complexes. A new reaction leading to secondary amines and imines
Source: Royal Society of Chemistry journal article supplement (doi:10.1039/b006136k), 2000-01-01

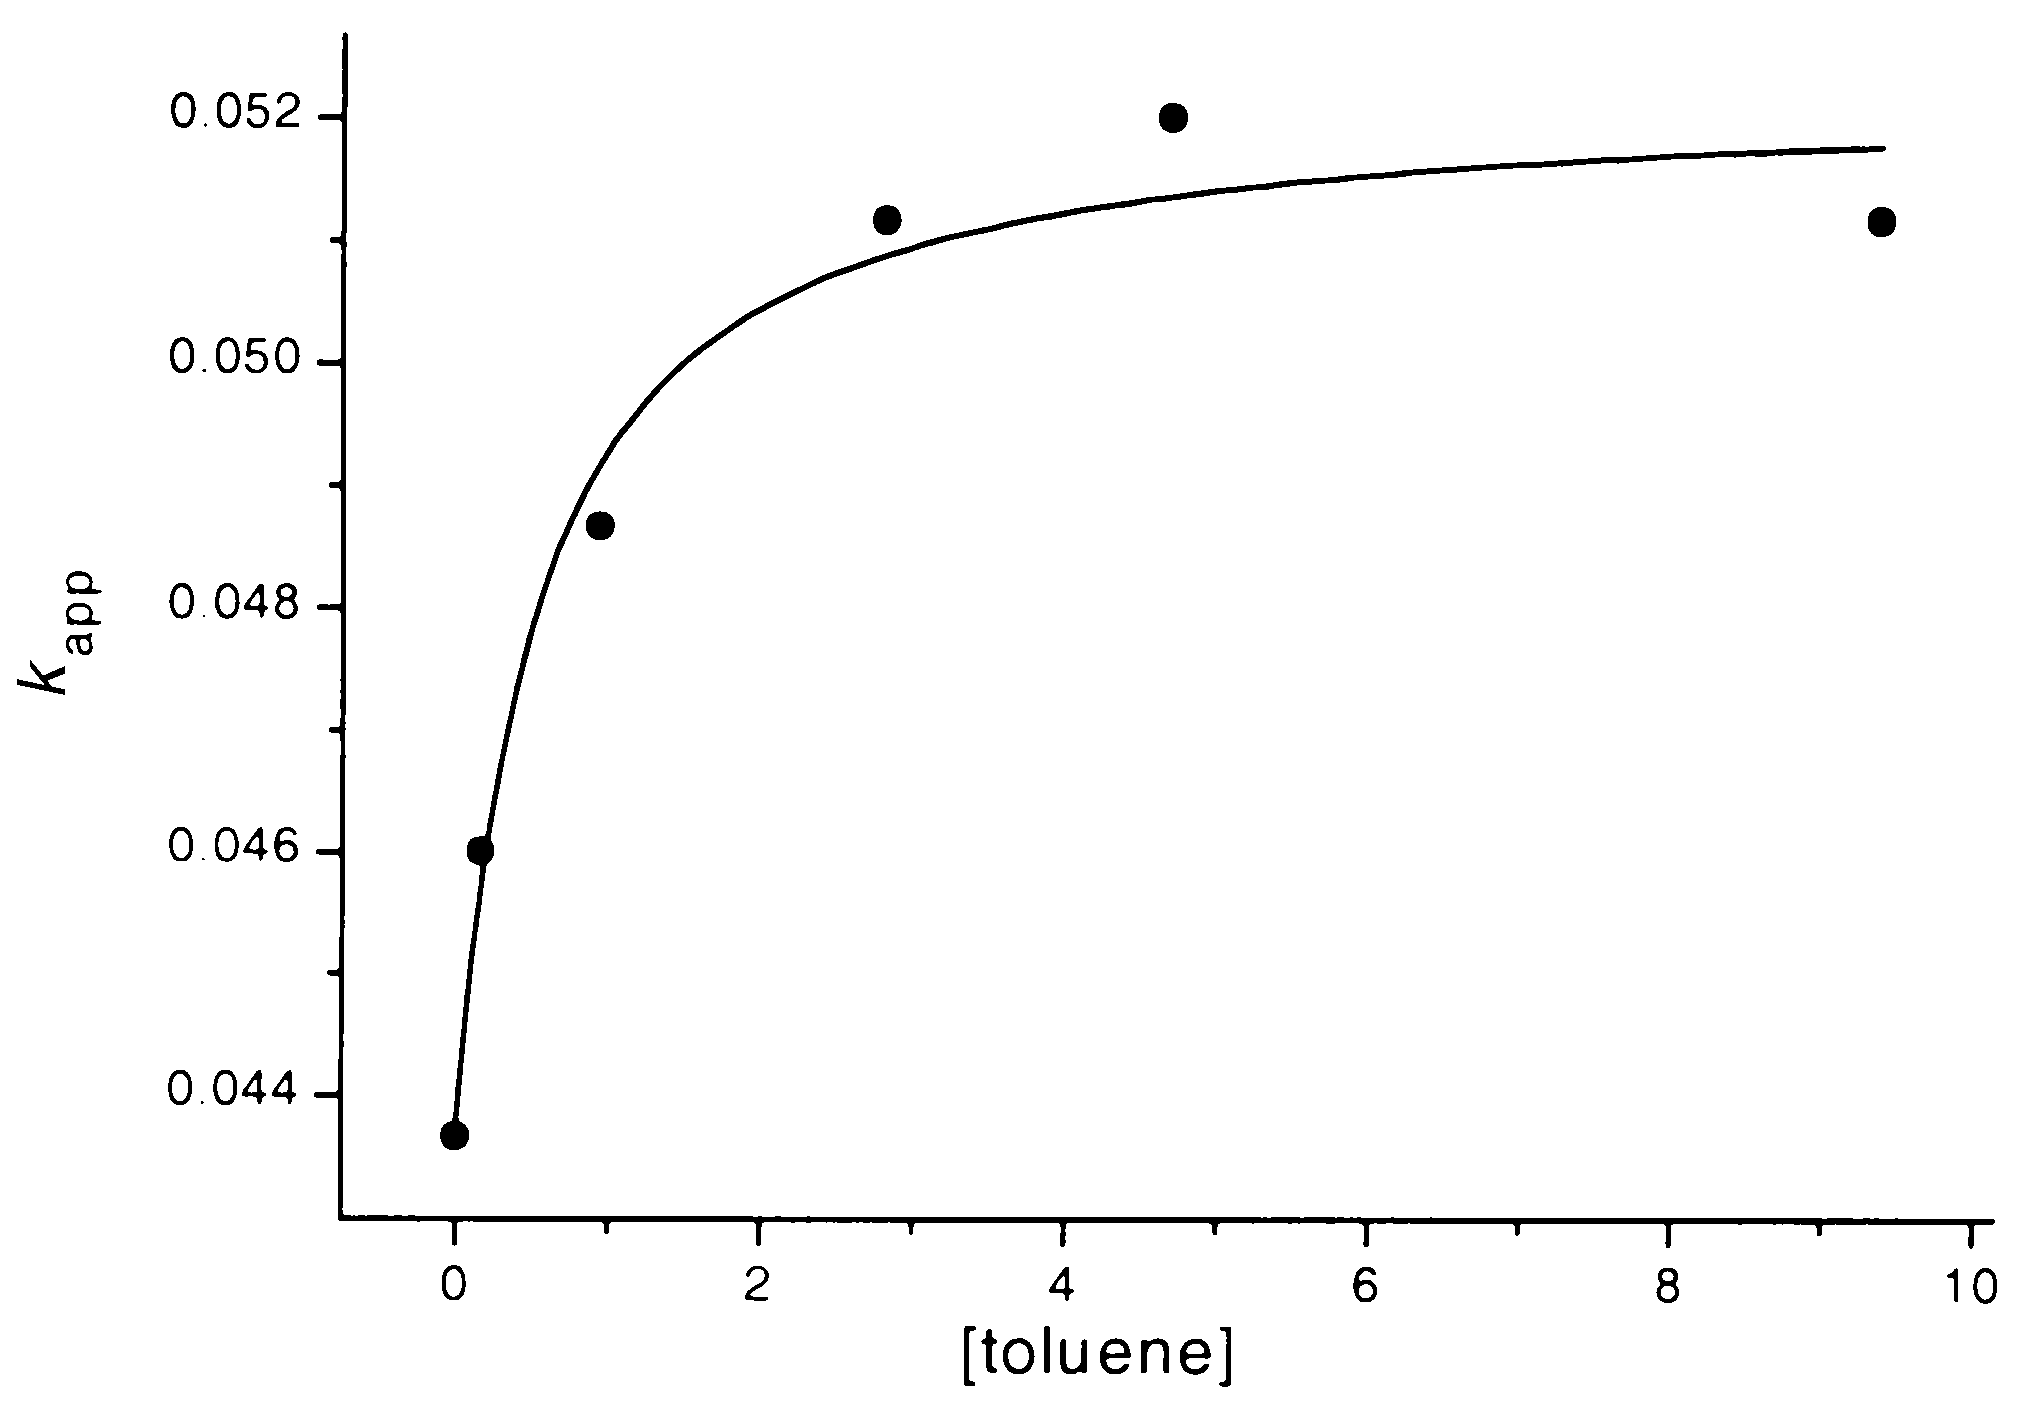

Supplement: b006136kf1.doc [file b006136kf1.doc]
